# Supplementary material for: Recruitment of Mre11 to recombination sites during meiosis
Source: Research Square preprint supplement (doi:10.21203/rs.3.rs-7215871/v1), 2025-08-19
Supplement: Supplementary file 1 [file 2e5ad9666df0a40efde04fbe.docx]

**Supplementary Information:**

**Recruitment of Mre11 to recombination sites during meiosis.**

Priyanka Priyadarshini1, Mahesh Survi1, Wael El Yazidi Mouloud2,3, Regina Bohn4, Steven Ballet2, Neil Hunter4,5, Alexander N. Volkov3,6 and Corentin Claeys Bouuaert1,*

1 Louvain Institute of Biomolecular Science and Technology, Université catholique de Louvain, 1348 Louvain-La-Neuve, Belgium.

2 Research Group of Organic Chemistry, Vrije Universiteit Brussel (VUB), Pleinlaan 2, 1050 Brussels, Belgium

3 Jean Jeener NMR Centre, Vrije Universiteit Brussel (VUB), Pleinlaan 2, 1050 Brussels, Belgium.

4 HHMI, University of California, Davis, CA 95616, US.

5 Department of Molecular & Cellular Biology, University of California, Davis, CA 95616, US.

6 VIB-VUB Center for Structural Biology, VIB, Pleinlaan 2, 1050 Brussels, Belgium.

* Correspondence to [corentin.claeys@uclouvain.be](mailto:corentin.claeys@uclouvain.be)

**Supplementary Figures:**

Figure S1: Properties of Mre11 nucleoprotein condensates.

Figure S2: Properties of MRX nucleoprotein condensates.

Figure S3: The C-terminal IDR of Mre11 is required for condensation.

Figure S4: Mre11 foci formation and expression during meiosis.

Figure S5: AlphaFold2 models of Mre11-Mer2 and conservation of Mre11-LLK and Mer2-EQEK residues.

Figure S6: Analysis of Mer2 – Mre11 interaction mutants.

Figure S7: The Mre11 C-terminus contains a novel SUMO-interaction motif.

Figure S8: NMR analysis of Smt3 bound to wild type and mutant SIM3 peptides.

Figure S9: ITC analysis of Smt3 binding to wild-type or mutant SIM3 peptides.

Figure S10: Protein expression and meiotic progression of Mre11 SIM3 mutants.

**Supplementary Tables:**

Table S1. Oligonucleotides used in this study.

Table S2. Plasmids used in this study.

Table S3. Synthetic peptides used in this study.

Table S4. Yeast strains used in this study.

Table S5. Protein sequences used for AlphaFold modeling.


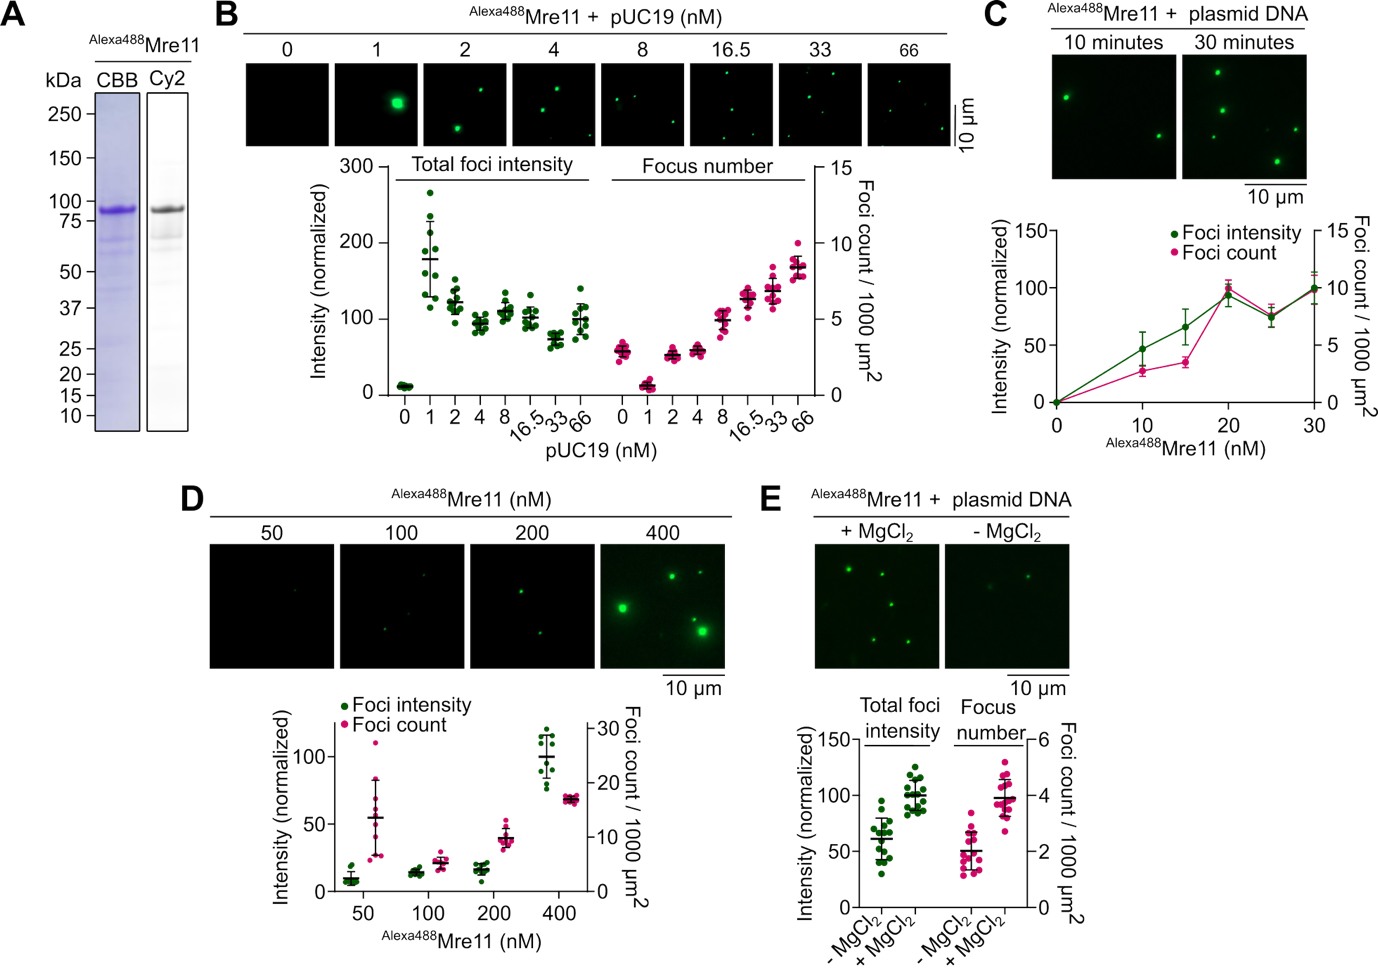


**Figure S1: Properties of Mre11 nucleoprotein condensates.**

**(A)** SDS-PAGE of Alexa488-labelled Mre11 stained with Coomassie Brilliant Blue (CBB) (left) and visualized with a Cy2 filter (right). **(B)** Effect of plasmid DNA (pUC19) concentration on Alexa488Mre11 condensate, visualized by epifluorescence microscopy. Quantification shows total fluorescence intensity (green) in a field of view normalized to the highest DNA concentration, and total number of foci per 1000 µm2 (magenta). Error bars represent mean ± SD from 10-11 fields of view. **(C)** Time-dependent change in Mre11 condensate assembly. Reactions contained 400 nM Alexa488Mre11, 5.7 nM plasmid DNA and 5% PEG. Samples were collected at the indicated time points, immediately placed on a glass slide, covered with coverslip, and imaged. Foci intensities are normalized to the mean of the sample drawn at 30 minutes post-incubation. Error bars represent mean ± SD from 10-15 fields of view. **(D)** Effect of Mre11 concentration on condensation in presence of plasmid substrate and 5% PEG. Foci intensities are normalized to the mean of the sample with 400 nM Mre11. Error bars represent mean ± SD from 10 fields of view. **(E)** Effect of presence of divalent cation (5 mM MgCl2) on Mre11 condensates assembled in presence of 5.7 nM pUC19. Foci intensities are normalized to reaction in the presence of magnesium.For experiment performed without magnesium (E), 5 mM EDTA was included in the reaction.


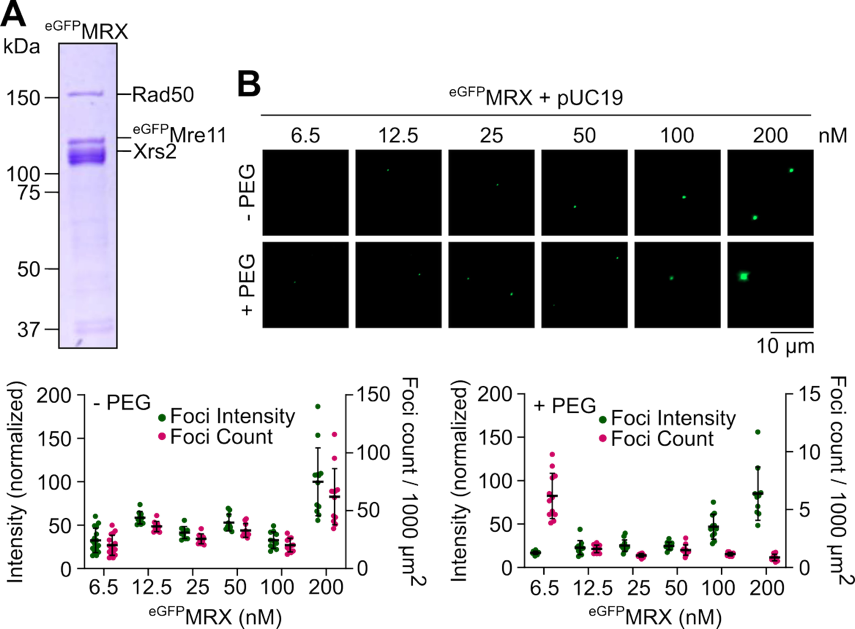


**Figure S2: Properties of MRX nucleoprotein condensates.**

**(A)** SDS-PAGE of eGFP-tagged Mre11-Rad50-Xrs2 (MRX) complex stained with Coomassie Brilliant Blue. **(B)** Effect of MRX concentration on nucleoprotein condensation in the presence or absence of 5% PEG. Foci intensities are normalized to the mean of the sample with 400 nM Mre11.

**
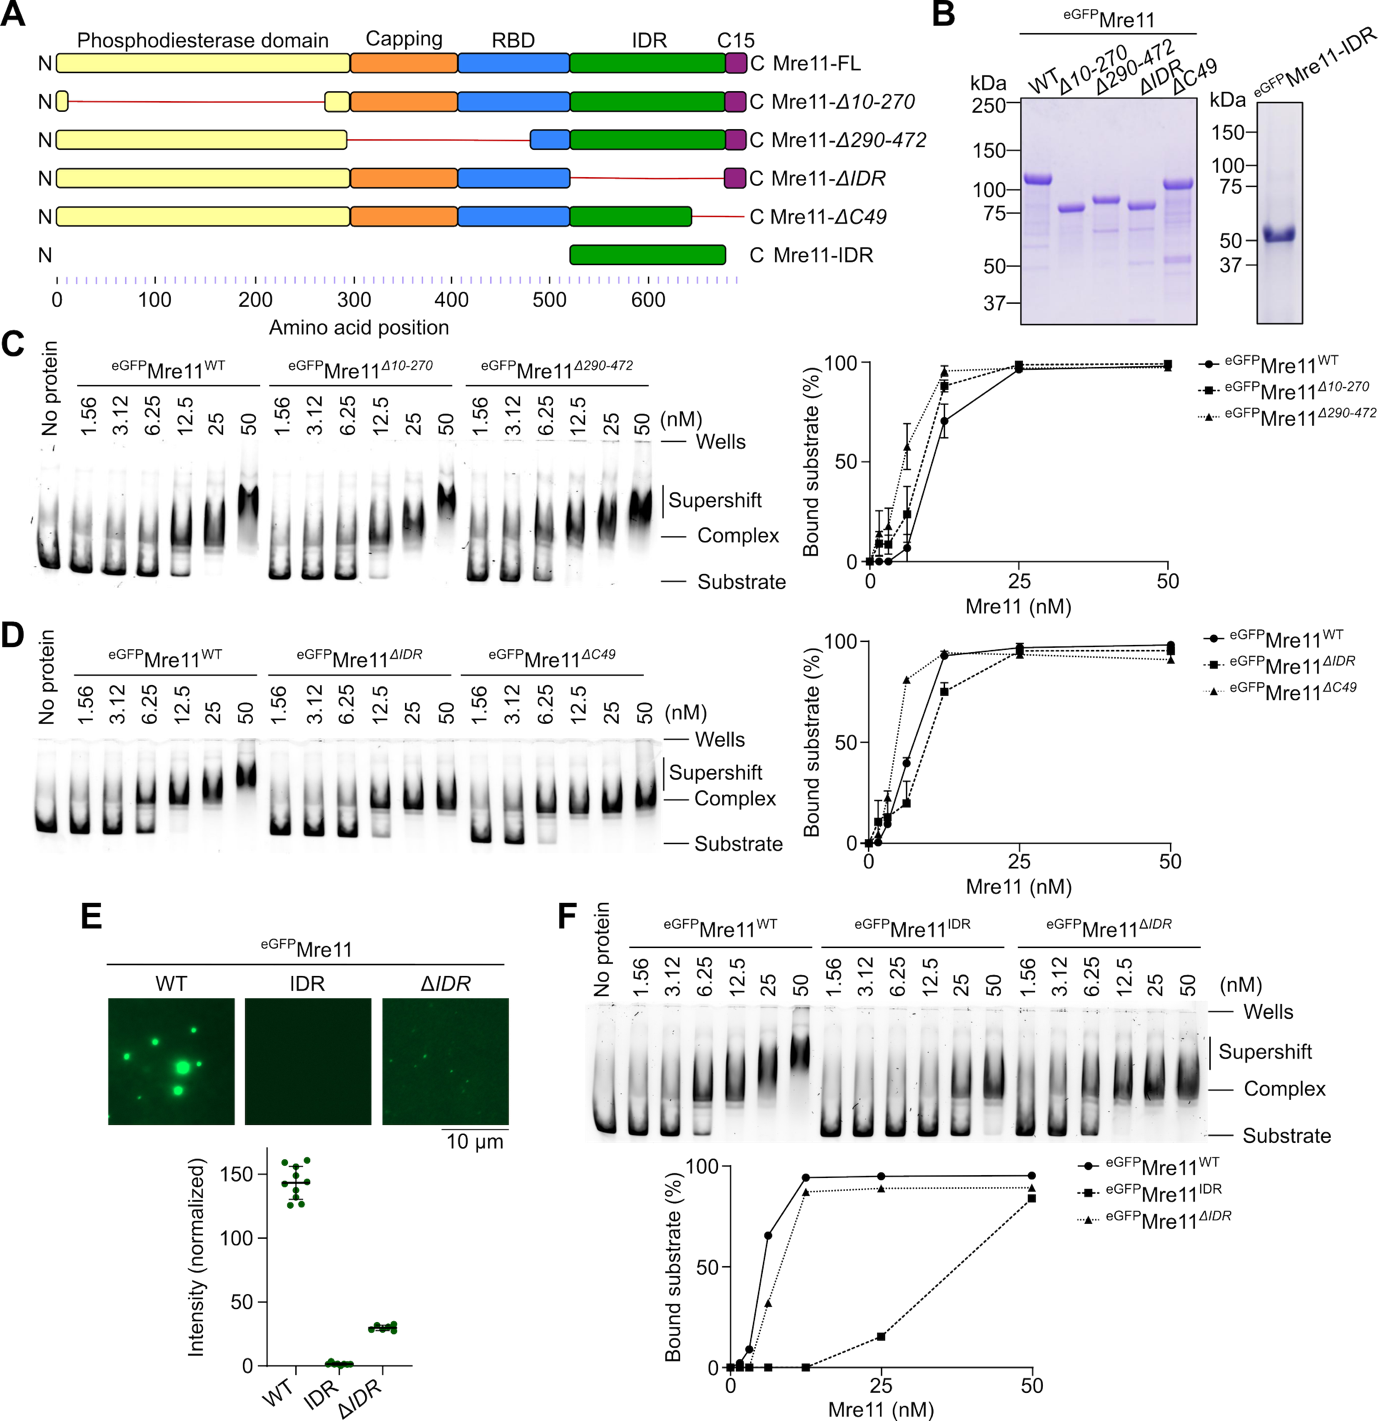
**

**Figure S3: The C-terminal IDR of Mre11 is required for condensation.**

**(A)** Cartoon diagram of full-length and truncated Mre11. IDR ranges from residues 524-677. Red line indicates truncated regions. **(B)** SDS-PAGE of purified WT and truncated eGFPMre11. **(C, D)** Effect of Mre11 truncations on plasmid DNA binding analyzed by gel shift assay. Error bars in C and D show ranges from two independent experiments. **(E)** *In vitro* condensation analysis of eGFP-tagged Mre11, Mre11-IDR (524-677), and Mre11-*ΔIDR* (*Δ524-677*). Foci intensities are normalized to the mean of wild-type eGFPMre11. Error bars represent mean ± SD from 6-10 fields of view. **(F)** Plasmid DNA binding of eGFP-tagged Mre11-IDR in comparison with Mre11 and Mre11-*ΔIDR* analyzed by gel shift assay.


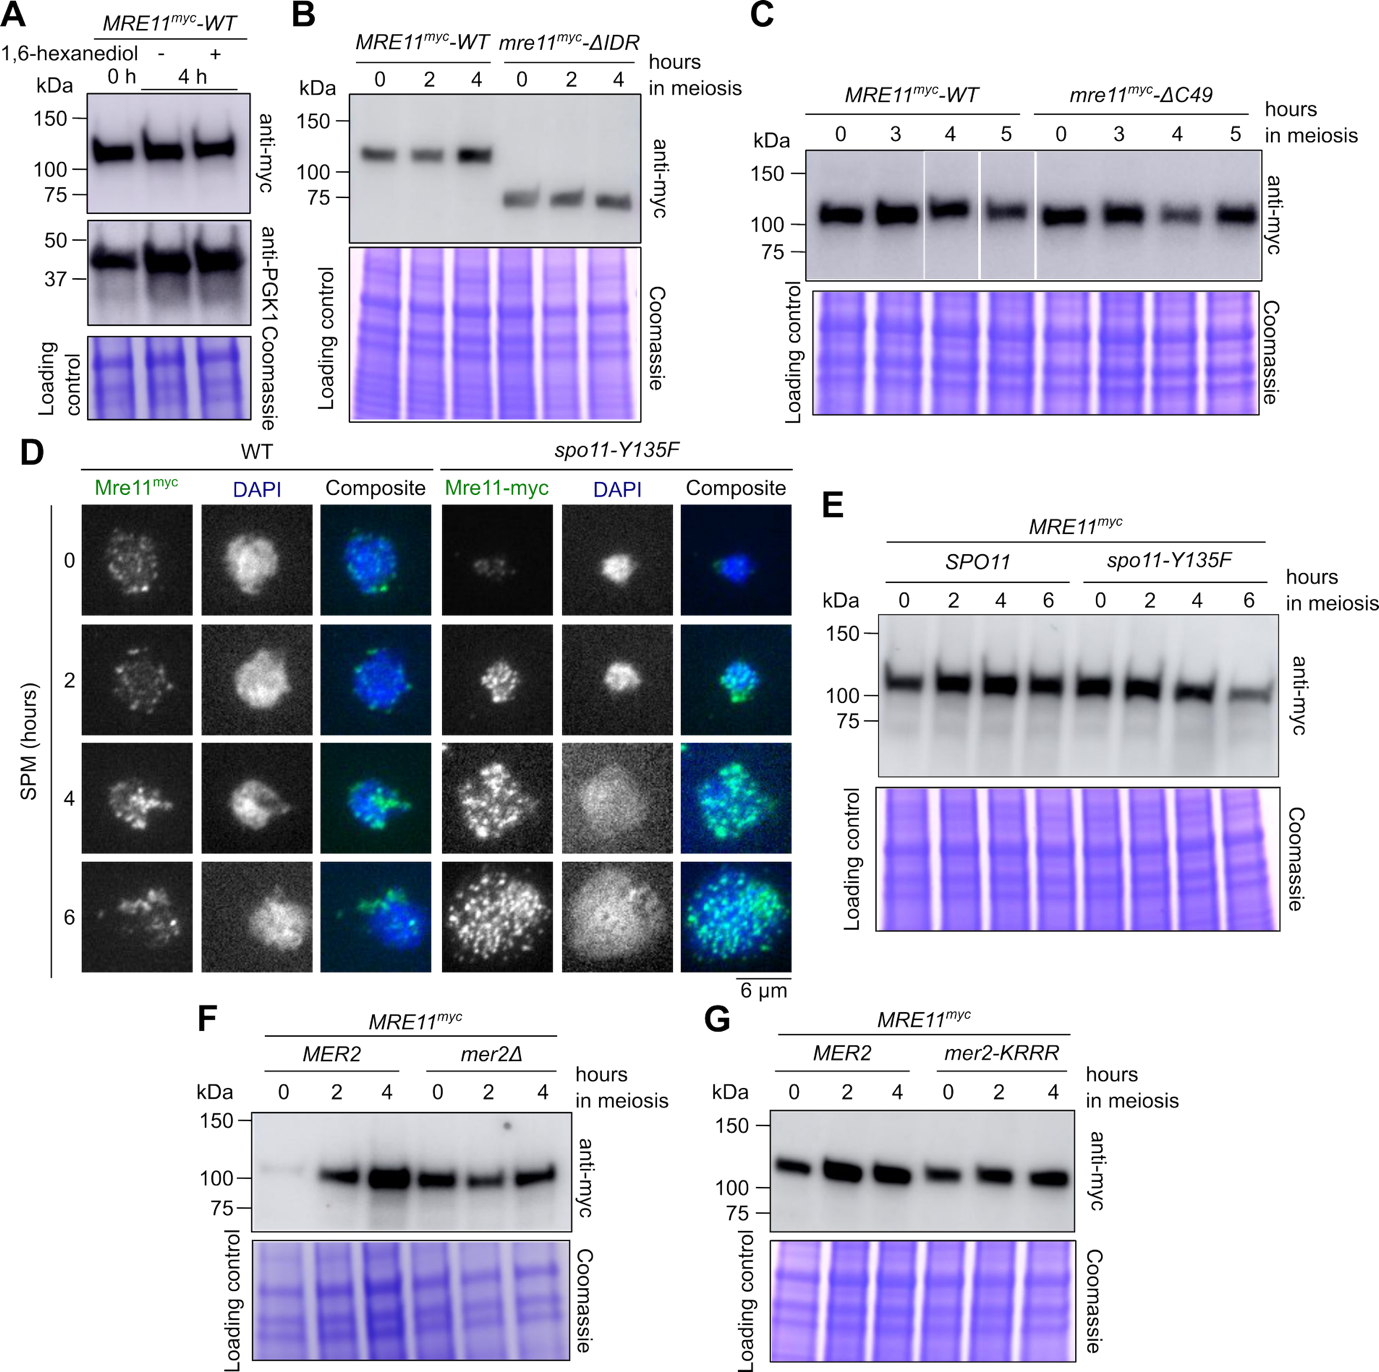


**Figure S4: Mre11 foci formation and expression during meiosis.**

**(A, B, C, E, F, G)** Western blot analysis of meiotic extracts of Mre11myc in (A) 1,6-hexanediol-treated Mre11myc strains harvested 4 hours after transferring to SPM, (B) wild type and Mre11-*ΔIDR* strains, (C) wild type and Mre11-*ΔC49* strains, (E) wild type and *spo11-Y135F* strains, (F) wild-type and *mer2Δ* strains, and (G)wild-type and *mer2-KRRR* strains. Coomassie-stained SDS-PAGE gels and anti-PGK1 Wester blots (panel 1) serve as loading controls. In panel C, all samples were loaded on the same gel, but lanes were re-ordered. **(D)** Immunofluorescence on meiotic nuclear spreads of myc-tagged Mre11 in wild-type and *spo11-Y135F* strains. Contrary to previously published ChIP results showing similar association and dissociation kinetics of Mre11 in wild-type and *spo11-Y135F* backgrounds40, in our hands Mre11 foci accumulate at late time points in a *spo11-Y135F* mutant.


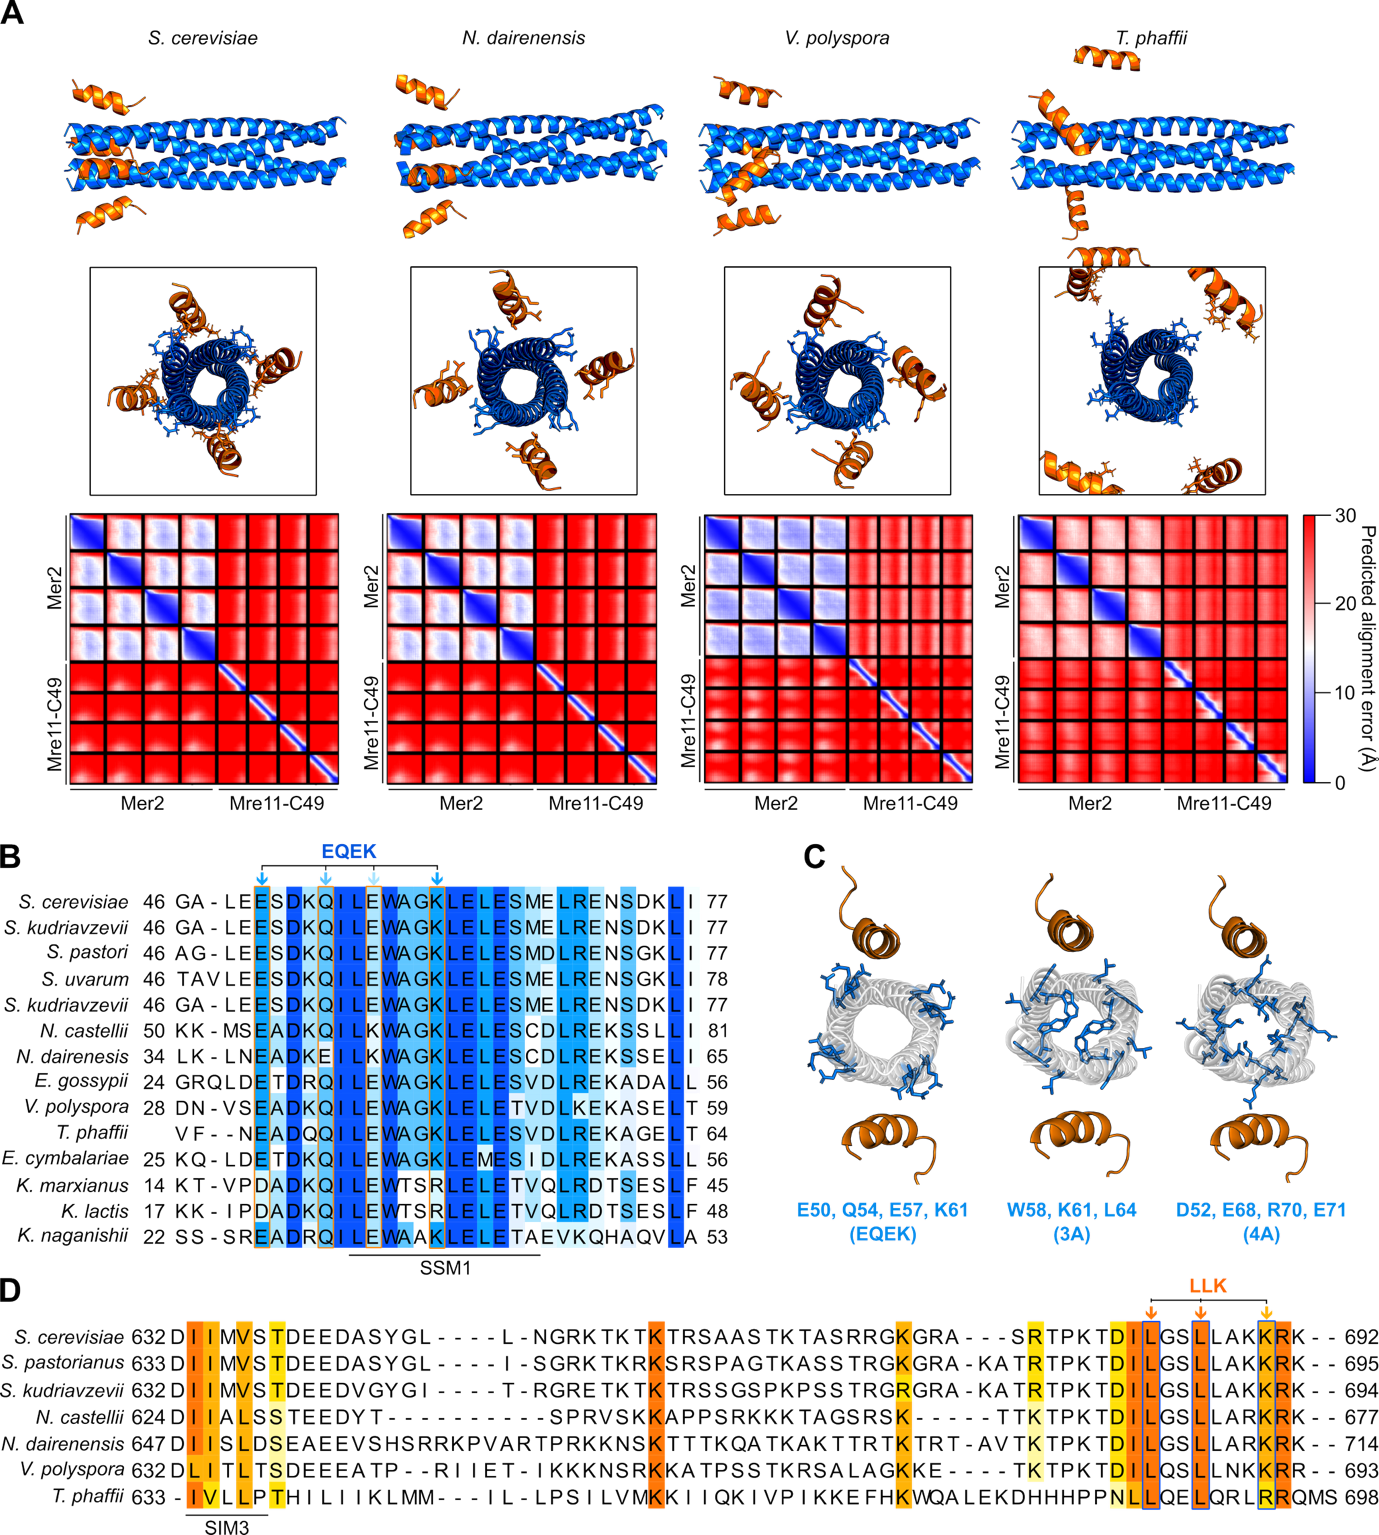


**Figure S5: AlphaFold2 models of Mre11-Mer2 complexes and sequence conservation.**

**(A)** AlphaFold2 models of 4:4 Mre11-Mer2 interaction domains in various species of Saccharomycetaceae*.* Mre11 is shown in orange and Mer2 in blue. Mre11-LLK and Mer2-EQEK residues are shown as orange and blue sticks, respectively, in the lateral views.Disordered regions are omitted for clarity. All models are similar, except for *T. phaffi* that is aberrant. Predicted alignment error plots for each model is shown below. Dark blue represents low predicted error and high confidence, whereas lighter shades and red indicates low confidence, typical for flexible or disordered regions. NCBI accession numbers for Mer2 and Mre11, respectively, are as follows: *Saccharomyces cerevisiae* (CAA60944, BAA02017), *Naumovozyma dairenensis* (XP_003669210.1, XP_003672532.1), *Vanderwaltozyma polyspora* (XP_001647040.1, XP_001642997.1), and *Tetrapisispora phaffii* (XP_003683996.1, XP_003686402.1). The sequences used for AlphaFold modeling are provided in **Table S5**. **(B, D)** Multiple sequence alignments of (B) Mer2 and (D) Mre11 in members of the Saccharomycetaceaeclass. EQEK residues are indicated by blue arrows and orange boxes and LLK residues are indicated by orange arrows and blue boxes. Alignment is colored based on percentage identity score on Jalview with a conservation threshold of 35% for Mer2 and 50% for Mre11. The previously-identified Mer2 signature sequence motif (SSM1) is indicated44. **(C)** Position of Mer2 EQEK residues (blue) on the AlphaFold2 model, and comparison with published 3A and 4A mutants41. Mre11 is in orange and Mer2 is in white.


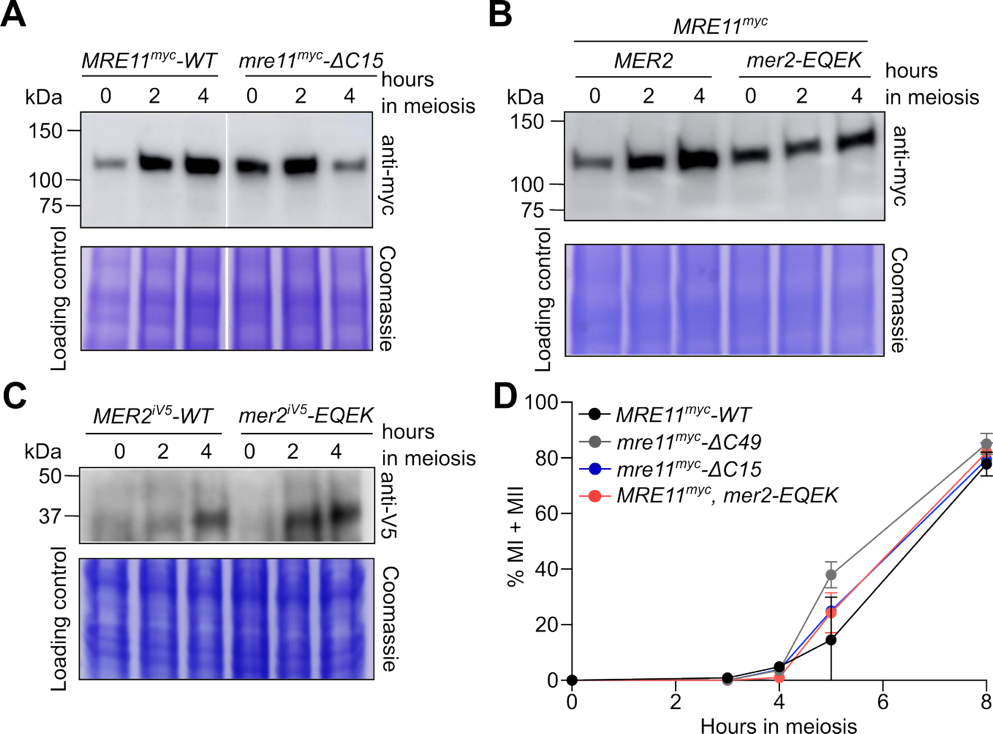


**Figure S6: Analysis of Mer2 – Mre11 interaction mutants.**

**(A, B, C)** Western blot analysis of meiotic extracts of (A) *MRE11myc-WT*and *mre11-ΔC15*myc, (B) *MRE11myc*in a *MER2* or *mer2-EQEK* strain, and (C) wild type or mutant *MER2iV5*strains. The *MER2iV5* allele has an internal V5 tag between Mer2 amino acids 248 and 249. Coomassie-stained SDS-PAGE gels serve as loading controls. (**D**) Meiotic progression, as indicated by the percentage of cells that have undergone the first or second meiotic divisions (MI + MII) (n = 2).


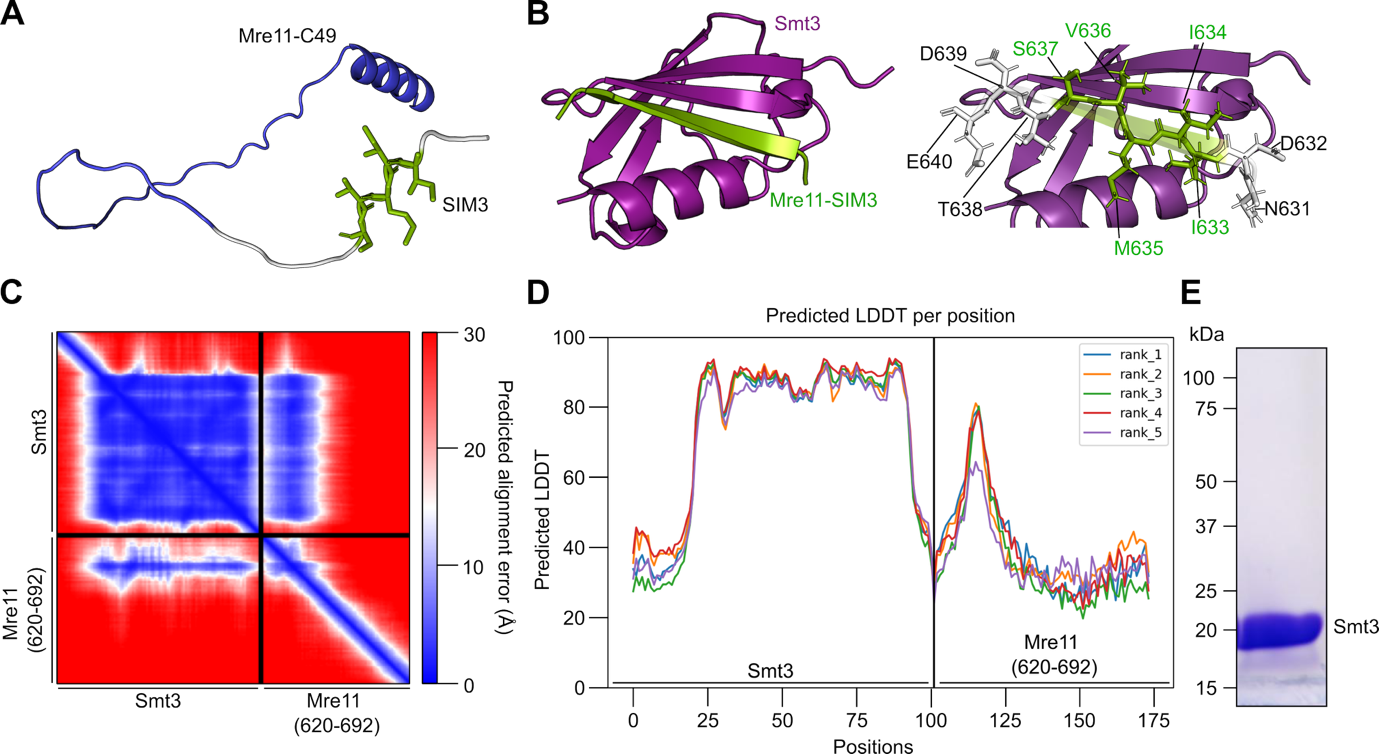


**Figure S7: The Mre11 C-terminus contains a novel SUMO-interaction motif.**

**(A)** Representation of Mre11 C-terminus (residues 630-692) from AlphaFold2 database (AF-P32829-F1-v4). The SIM3 motif (green) is located immediately before the Mre11-C49 residues (blue). **(B)** AlphaFold2 model of Smt3 (purple) and Mre11-SIM3 (residues 630-640) (green). Note that SIM3 is predicted to be disordered in panel A but folds as a β-sheet when bound to Smt3. Disordered regions of Smt3 and Mre11 are omitted for clarity. The sequences used for AlphaFold modeling are provided in **Table S5**. **(C)** Predicted aligned error (Å) plot for AlphaFold2 model of Smt3 and Mre11-SIM3 (residues 620-692). The x- and y-axis show amino acid residue numbers. Darker blue represents low predicted error and high confidence, whereas lighter shades and red indicates low confidence, typical for flexible or disordered regions. **(D)** Predicted Local Distance Difference Test (pLDDT) plot for AlphaFold2 model of Smt3 and Mre11-SIM3. The x-axis represents amino acid position and y-axis represents per-residue pLDDT score. Higher scores indicate greater confidence in local structure prediction. **(E)** SDS-PAGE of purified His-tagged U-[13C,15N] Smt3.


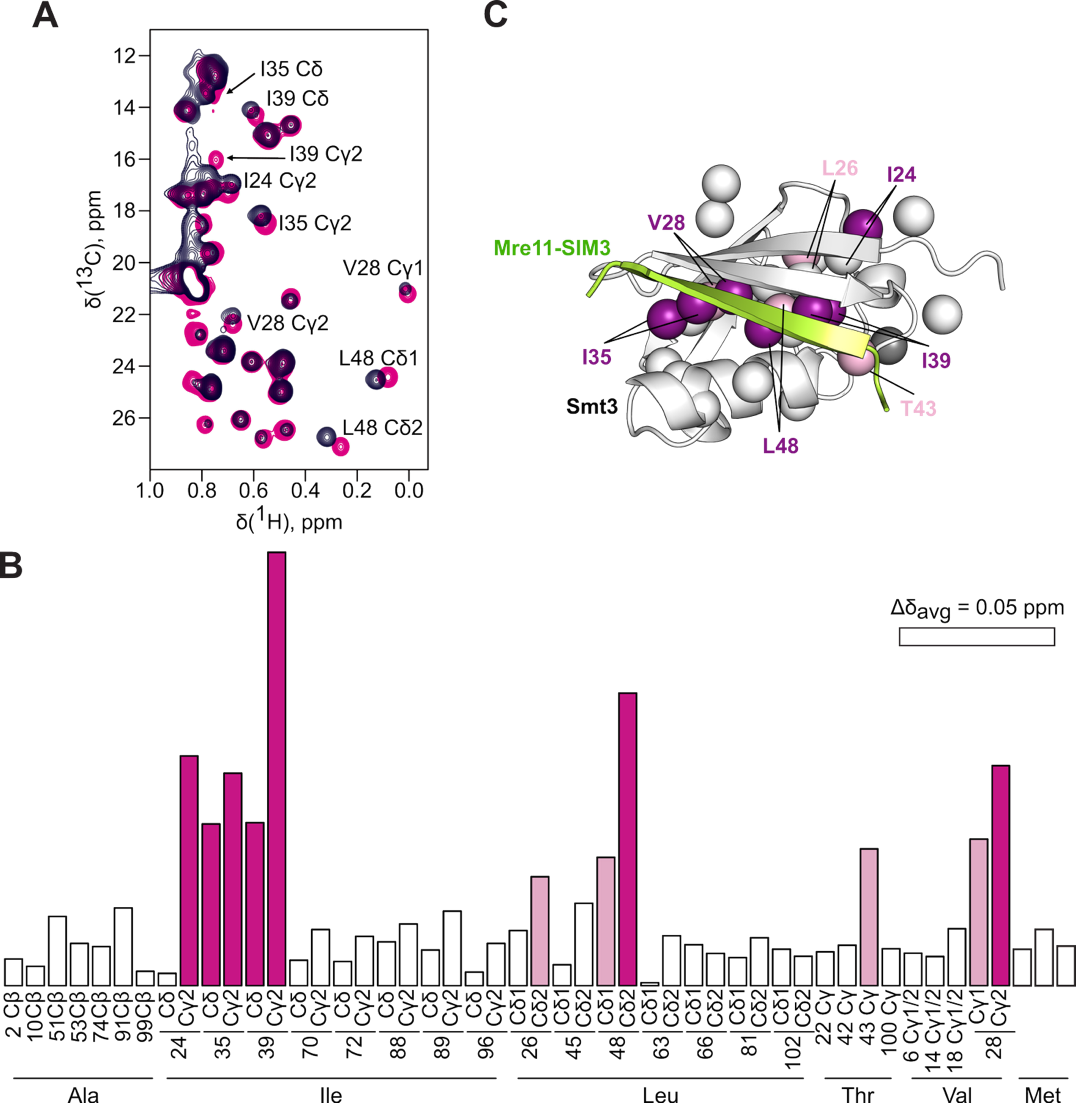


**Figure S8: NMR analysis of Smt3 bound to wild type and mutant SIM3 peptides.**

**(A)** Methyl regions of [1H,13C] HSQC spectra of the free Smt3 (black) and in the presence of 1.2 molar equivalents of wild type SIM3 peptide (magenta). The labels indicate the protein CH3 groups showing the largest binding shifts. **(B)** Average methyl chemical shift perturbations (Δδavg) of Smt3 upon binding to wild-type SIM3 peptide. The pink and magenta bars correspond to the CH3 groups with Δδavg > 0.03 ppm and > 0.05 ppm, respectively. For V6, V14, and V18, which show identical Cy1 and Cy2 NMR resonances, a single bar is shown. As the Cδ resonances of M49, M60, and M83 were not explicitly assigned in this work, the data for the methionine methyls are represented by unmarked bars. **(C)** Chemical shift mapping of the wild type SIM3 peptide binding. Smt3 methyls are shown as spheres, colored according to Δδavg as in panel B. The bound SIM3 peptide is in green, and the disordered Smt3 N- and C-termini are omitted for clarity


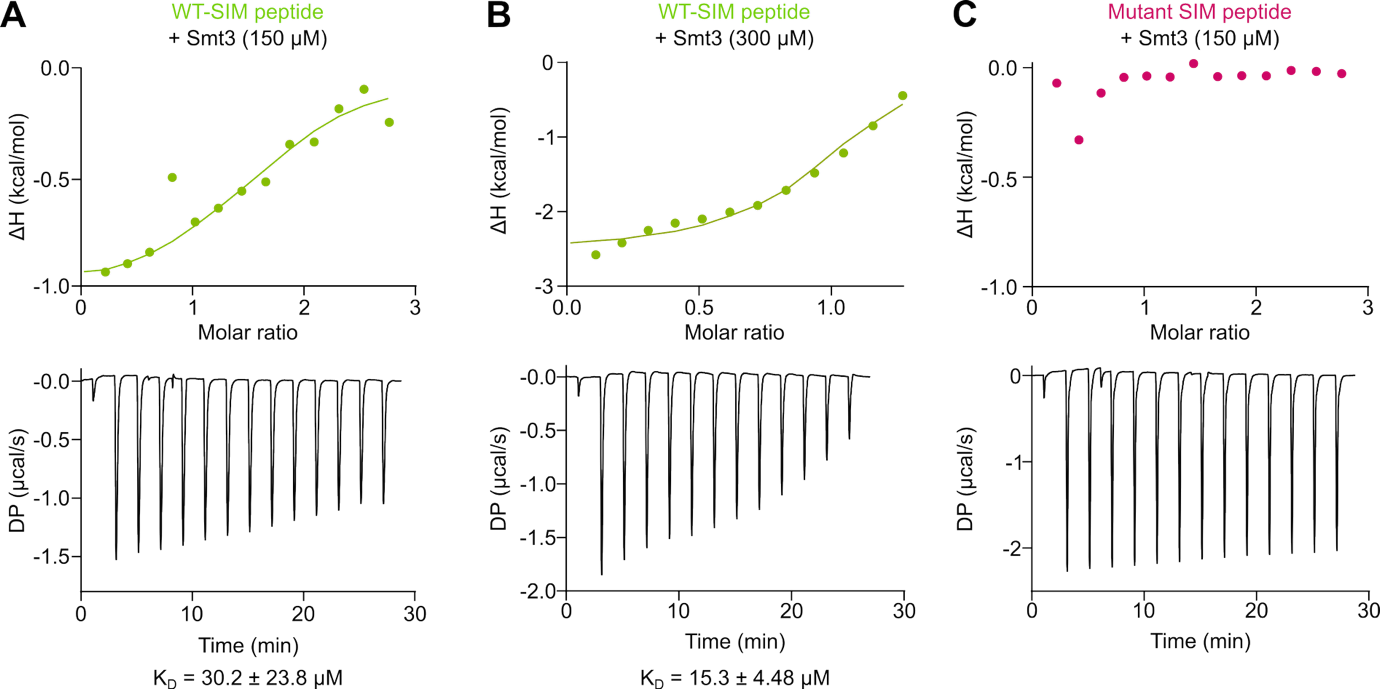


**Figure S9: ITC analysis of Smt3 binding to wild-type or mutant SIM3 peptides.**

Top panels, integrated heat peaks ΔH (kcal/mol) as a function of molar ratio (peptide/protein concentration) after buffer subtraction and offset correction. Bottom panels, raw data plots indicating differential power (μcal/s) after baseline correction in function of time. The data was fitted to a single binding site model and the number of binding sites (N) was set to 1. The model allowed for the calculation of the equilibrium dissociation constant KD as provided below each graph.


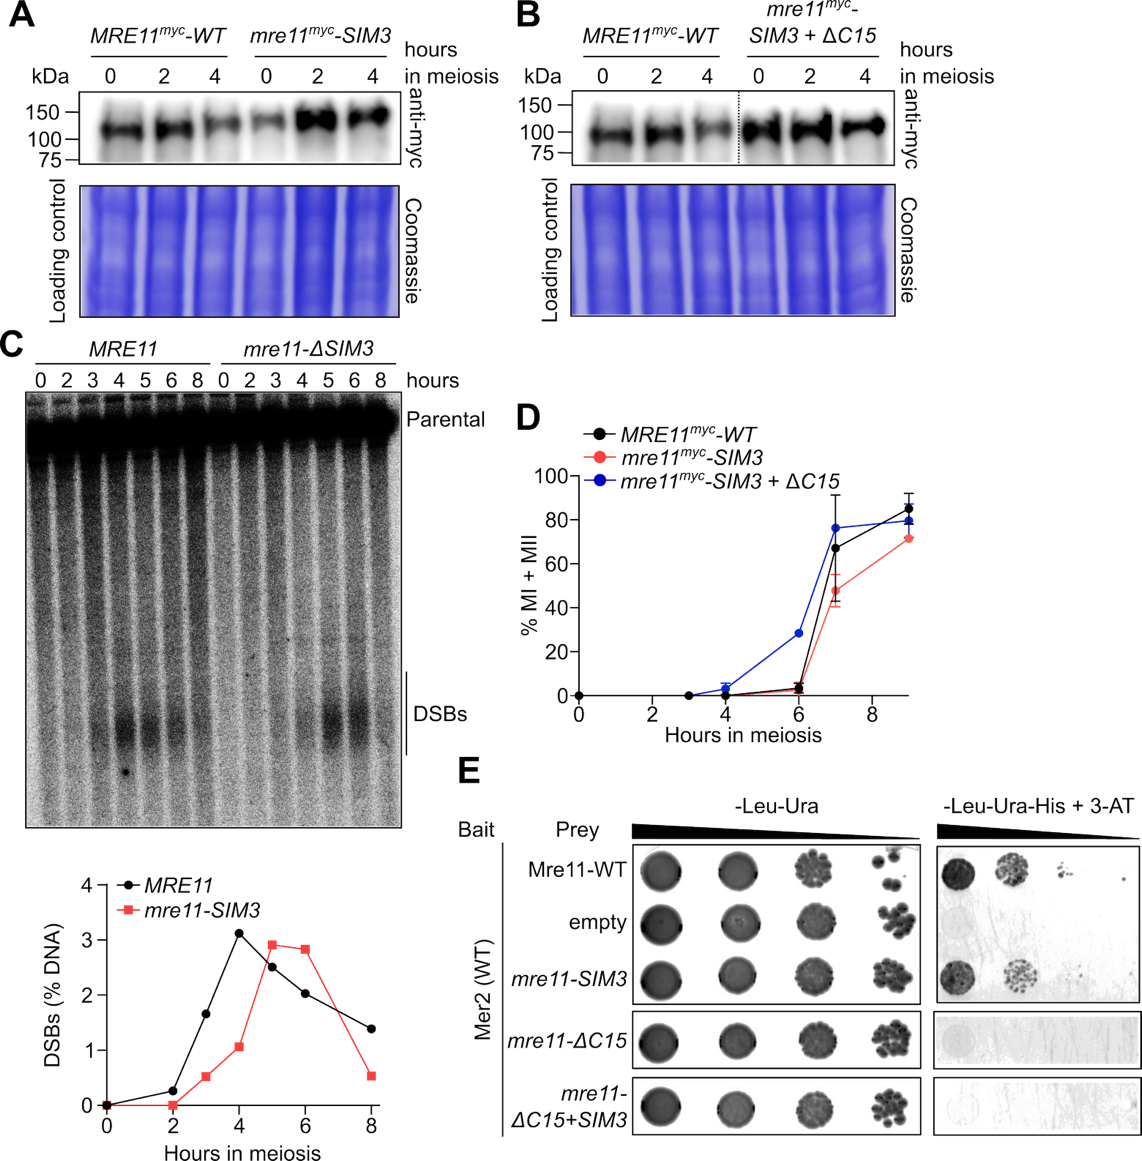


**Figure S10: Protein expression and meiotic progression of Mre11 SIM3 mutants.**

**(A, B)** Western blot analysis of meiotic extracts of (A) *MRE11myc-WT*and *mre11-SIM3*myc, (B) *MRE11myc-WT* and *mre11-SIM3+C15*myc. Coomassie-stained SDS-PAGE gels serve as loading controls. **(C)** Southern blot analysis of meiotic DSB formation at the *GAT1* hotspot. **(D)** Meiotic progression, as indicated by the percentage of cells that have undergone the first or second meiotic divisions (MI + MII) (n = 2). (**E**) Yeast-two-hybrid analysis between Mer2 wild-type (binding domain, bait) and Mre11 wild-type and mutants (activation domain, prey).

| **Primer No.** | **Sequence** |
| --- | --- |
| cb1351 | CCGTCCCACCATCGGGCGCGGATCCACCATGGACTATCCTGATCC |
| cb1352 | GCTCGTCGACGTAGGCCTTTGAATTCCTAATGATGGTGGTGGTGATGATGATGGTGGTGTTTTCTTTTCTTAGCAAGGAGAC |
| cb1353 | CCGTCCCACCATCGGGCGCGGATCCACCATGAGCGCTATCTATAAATTATCTATTCAG |
| cb1354 | GCTCGTCGACGTAGGCCTTTGAATTCTCAATAAGTGACTCTGTTAATATCG |
| cb1355 | CCGTCCCACCATCGGGCGCGGATCCACCATGTGGGTAGTACGATACC |
| cb1356 | GCTCGTCGACGTAGGCCTTTGAATTCTCATTTGTCATCATCGTCCTTGTAATCCTTGTCATCGTCATCTTTATAATCTCCTTTTCTTCTTTTGAACG |
| cb1424 | CGACTCACTATAGGGCGAATTGGAGCTCGAAAATAAAGGCATCTACAAATCTC |
| cb1425 | CCTCACTAAAGGGAACAAAAGCTGGGTACCTTCAGCAAATAGCATTCAAC |
| cb1435 | AGCGTCCTCTTCGTC |
| cb1458 | CACCACCATCATCATCACCACCACCATCATTAGGAATTCAAAGGCCTAC |
| cb1486 | GGATTGGAAGTACAGGTTTTC |
| cb1561 | TATCGCCTTGTCCGATGCCTCTAAAGCGCCTGC |
| cb1562 | CTGGCATGGGCAGGTGCACTGGAATTGGAGAGTATG |
| dam005 | CCCTGCTGGGCCTGGACAGCACCCGTAAGAAGTCCGTGCC |
| dam006 | GGTTGGGGATGGGCTTGCCCTGCTTATCGTGGGCT |
| pp3 | ACTGACGAAGAGGACGC |
| pp4 | AGCAGCTGCAGCTGCGTCATTCTCATCAATATC |
| pp24 | AGCACGCTTAACCTGTTTTATAAGC |
| pp25 | CCAAAGACGGATATTCTTGG |
| pp26 | TATTGTGTCTGGATCAGGAT |
| pp27 | GAGGCTGAGGCACAACCCAA |
| pp28 | TGCTTCTCCATACTTTATGTC |
| pp29 | GTAGATAAAGATGAGAAAACAGCTC |
| pp46 | GAACAAAAGCTGGGT |
| pp55 | CACCACCATCATCATCACCACCACC |
| pp59 | GGCATGGACGAGCTGTACAAGGGATCCACCATGAACAGTGTTAGGCCGACTCC |
| pp60 | GGTGGTGGTGATGATGATGGTGGTGCTTTGGCGTCCTTGATGCTCTTCC |
| pp61 | GGTGGATCCCTTGTACAGCTCGTCCATGCC |
| pp72 | CGTCCTTGATGCTCTTCCTTT |
| pp73 | GAACAAAAGCTGGGTACCGG |
| pp84 | CTAAGGCCAGAAAAATTCGAGCTCGGCGCGCC |
| pp85 | CAAGAGCACTTCCCGCAATATCCGTCTTTGGCG |
| pp92 | AGTTATGGTTTACTTAATGGT |
| pp120 | CTCGAGCACCACCACCA |
| pp136 | TGGTGGTGGTGGTGCTCGAGTCATTTTCTTTTCTTAGCAAGGA |
| pp148 | CCATTAAGTAAACCATAACTCTTGTACAACTCATCCATAC |
| pp149 | AAAACCTGTACTTCCAATCCATGGTGTCTAAAGGTGAAGC |
| RB70 | AGCTGCGTCATTCTCATCAATATCAACATCATCTTG |
| RB267 | GCAGCCGCTACTGACGAAGAGGACGCTAGTTATGG |
| RB268 | TAAAAGCTGTCGAGAAGTACTAG |
| RB269 | CGTCCTTGATGCTCTTCC |

**Table S1.** Oligonucleotides used in this study.

| **Description** | **Plasmid** | **Reference** |
| --- | --- | --- |
| SUMO-Mer2 in pSMT3 | pCCB750 | 9 |
| SUMO-eGFP-Mer2 in pSMT3 | pCCB777 | 9 |
| mScarlet-Mer2 in pSMT3 | pCCB785 | This study |
| Mre11-10xHis in pFastBac1 | pCCB865 | This study |
| Rad50 in pFastBac1 | pCCB866 | This study |
| Xrs2-2xFLAG in pFastBac1 | pCCB867 | This study |
| eGFP-Mre11-10xHis in pFastBac1 | pCCB942 | This study |
| eGFP-Mre11-*ΔC49*-10xHis in pFastBac1 | pCCB943 | This study |
| Smt3-6xHis in pET28b | pCCB998 | 67 |
| MBP-Mre11-C49 + HisSUMO-Mer2 in pETDuet1 | pCCB1040 | This study |
| Mer2-*EQEK*::HphMX in PCR-Blunt II-TOPO | pCCB1046 | This study |
| Mer2iV5-*EQEK*::HphMX in PCR-Blunt II-TOPO | pCCB1048 | This study |
| Mre11-8xmyc::URA3 in PCR-Blunt II-TOPO | pry2 | This study |
| eGFP-Mre11-*Δ290-472*-10xHis in pFastBac1 | pry5 | This study |
| eGFP-Mre11-*ΔIDR*-10xHis in pFastBac1 | pry6 | This study |
| eGFP-Mre11-*Δ10-270*-10xHis in pFastBac1 | pry7 | This study |
| Mre11-*ΔC49*-8xmyc::URA3 in PCR-Blunt II-TOPO | pry24 | This study |
| Mre11-*ΔIDR*-8xmyc::URA3 in PCR-Blunt II-TOPO | pry30 | This study |
| eGFP-Mre11-IDR-10xHis in pFastBac1 | pry41 | This study |
| Mre11-*ΔC15*-8xmyc::URA3 in PCR-Blunt II-TOPO | pry42 | This study |
| Mre11-*SIM3*-8xmyc::URA3 in PCR-Blunt II-TOPO | pry56 | This study |
| Mre11-*ΔC15*+*SIM3*-8xmyc::URA3 in PCR-Blunt II-TOPO | pry57 | This study |
| MBP-Mre11-C49 + HisSUMO-Mer2-*EQEK* in pETDuet1 | pry59 | This study |
| MBP-Mre11-C49-*LLK* + HisSUMO-Mer2 in pETDuet1 | pry61 | This study |
| MBP-mScarlet-Mre11-C49 in pET28a | pry109 | This study |
| Mer2iV5::HpHMX in PCR-Blunt II-TOPO | pDAM003 | This study |
| Mer2::HphMX in PCR-Blunt II-TOPO | pMH002 | 43 |
| Mer2 in pGBDU-C1 | pWL1592 | 41 |
| Mre11 in pGAD-C1 | pWL1596 | 41 |
| pGAD-C1 | pWL1565 | 41 |
| Mre11-*SIM3* in pGAD-C1 | pNH1371 | This study |
| Mre11-*ΔC15* in pGAD-C1 | pNH1372 | This study |
| Mre11-*ΔC15*+*SIM3* in pGAD-C1 | pNH1373 | This study |

**Table S2.** Plasmids used in this study.

| **Name** | **Sequence** | **Brutoformula** | **Calculated mass [M+H]+** | **Measured mass [M+H]+** |
| --- | --- | --- | --- | --- |
| Mre11-SIM - WT | ENDIIMVSTDE | C51H84N12O23S | 1265.5571 | 1265.5593 |
| Mre11-SIM - mutant | ENDAIAVSTDE | C46H74N12O23 | 1163.5068 | 1163.5074 |

**Table S3.** Synthetic peptides used in this study.

| **Strain** | **Genotype** | **Reference** |
| --- | --- | --- |
| CBY6 | *MATa, ho::LYS2, lys2, ura3, leu2::hisG, trp1::hisG* |  |
| CBY7 | *MATα, ho::LYS2, lys2, ura3, leu2::hisG, trp1::hisG* |  |
| CBY29 | *MATα, ho::LYS2, lys2, ura3, leu2::hisG, mer2Δ::KanMX4* |  |
| CBY317 | *MATα, ho::LYS2, lys2, ura3, leu2, arg4, SPO11-Y135F-His6-flag3-loxP-hphMX-loxP* |  |
| CBY375 | *MATa, ho::LYS, ura3, leu2::hisG, trp1::hisG, MRE11-myc::URA3, arg4-nsp* |  |
| CBY596 | *MATa, ho::LYS2, lys2, ura3, leu2::hisG, trp1::hisG, MRE11-8xmyc::URA3* | This study |
| CBY597 | *MATα, ho::LYS2, lys2, ura3, leu2::hisG, trp1::hisG, MRE11-8xmyc::URA3* | This study |
| CBY613 | *MATα, ho::LYS2, lys2, ura3, leu2::hisG, trp1::hisG, mer2-KRRR::hphMX4* | 43 |
| CBY727 | *MATa, ho::LYS2, lys2, ura3, leu2::hisG, trp1::hisG, arg4, MRE11-8xmyc::URA3, SPO11-Y135F-His6-flag3-loxP-hphMX-loxP* | This study |
| CBY728 | *MATα, ho::LYS2, lys2, ura3, leu2::hisG, trp1::hisG, arg4, MRE11-8xmyc::URA3, SPO11-Y135F-His6-flag3-loxP-hphMX-loxP* | This study |
| CBY845 | *MATa, ho::LYS2, lys2,  ura3, leu2::hisG, trp1::hisG, mer2-KRRR::hphMX4, MRE11-8xmyc::URA3* | This study |
| CBY846 | *MATα, ho::LYS2, lys2, ura3, leu2::hisG, trp1::hisG, mer2-KRRR::hphMX4, MRE11-8xmyc::URA3* | This study |
| CBY849 | *MATa, ho::LYS2, lys2, ura3, leu2::hisG, trp1::hisG, mer2Δ::MER2iV5::hphMX, MRE11-8xmyc::URA3* | This study |
| CBY850 | *MATα, ho::LYS2, lys2, ura3, leu2::hisG, trp1::hisG, mer2Δ::MER2iV5::hphMX, MRE11-8xmyc::URA3* | This study |
| CBY864 | *MATα, ho::LYS2, lys2, ura3, leu2::hisG, trp1::hisG, mer2Δ::MER2iV5::hphMX* | This study |
| CBY868 | *MATa, ho::LYS2, lys2, ura3, leu2::hisG, trp1::hisG, mer2Δ::MER2iV5::hphMX* | This study |
| CBY872 | *MATa, ho::LYS2, lys2, ura3, leu2::hisG, trp1::hisG, mre11-ΔC49-8xmyc::URA3* | This study |
| CBY873 | *MATα, ho::LYS2, lys2, ura3, leu2::hisG, trp1::hisG, mre11-ΔC49-8xmyc::URA3* | This study |
| CBY1013 | *MATa, ho::LYS2, lys2, ura3, leu2::hisG, trp1::hisG, mre11-ΔIDR-8xmyc::URA3* | This study |
| CBY1014 | *MATα, ho::LYS2, lys2, ura3, leu2::hisG, trp1::hisG, mre11-ΔIDR-8xmyc::URA3* | This study |
| CBY1017 | *MATa, ho::LYS2, lys2, ura3, leu2::hisG, trp1::hisG, mer2-EQEK::hphMX4* | This study |
| CBY1018 | *MATα, ho::LYS2, lys2, ura3, leu2::hisG, trp1::hisG, mer2-EQEK::hphMX4* | This study |
| CBY1021 | *MATa, ho::LYS2, lys2, ura3, leu2::hisG, trp1::hisG, mer2iV5-EQEK::hphMX4* | This study |
| CBY1022 | *MATα, ho::LYS2, lys2,  ura3, leu2::hisG, trp1::hisG, mer2iV5-EQEK::hphMX4* | This study |
| CBY1025 | *MATa, ho::LYS2, lys2, ura3, leu2::hisG, trp1::hisG, MRE11-8xmyc::URA3, mer2Δ::KanMX4* | This study |
| CBY1026 | *MATα, ho::LYS2, lys2, ura3, leu2::hisG, trp1::hisG, MRE11-8xmyc::URA3, mer2Δ::KanMX4* | This study |
| CBY1027 | *MATa, ho::LYS2, lys2, ura3, leu2::hisG, trp1::hisG, mre11-ΔC15-8xmyc::URA3* | This study |
| CBY1028 | *MATα, ho::LYS2, lys2, ura3, leu2::hisG, trp1::hisG, mre11-ΔC15-8xmyc::URA3* | This study |
| CBY1034 | *MATa, ho::LYS2, lys2, ura3, leu2::hisG, trp1::hisG, mer2-EQEK::hphMX4, MRE11-8xmyc::URA* | This study |
| CBY1035 | *MATα, ho::LYS2, lys2, ura3, leu2::hisG, trp1::hisG, mer2-EQEK::hphMX4, MRE11-8xmyc::URA3* | This study |
| CBY1048 | *MATa, ho::LYS2, lys2, ura3, leu2::hisG, trp1::hisG, mre11-SIM+ΔC15-8xmyc::URA3* | This study |
| CBY1049 | *MATα, ho::LYS2, lys2, ura3, leu2::hisG, trp1::hisG, mre11-SIM+ΔC15-8xmyc::URA3* | This study |
| CBY1237 | *MATa, ho::LYS2, lys2, ura3, leu2::hisG, trp1::hisG, mre11-ΔSIM-8xmyc::URA3* | This study |
| CBY1238 | *MATα, ho::LYS2, lys2, ura3, leu2::hisG, trp1::hisG, mre11-ΔSIM-8xmyc::URA3* | This study |
| yWL365 | *MATa, ura3-52, leu2-3, his3, trp1, gal4del, gal80del, GAL2-ADE2, LYS2::GAL1-HIS3, met2::GAL7-lacZ* | 41 |

**Table S4.** Yeast strains used in this study.

| **Protein** | **Organism** | **NCBI Accession No.** | **Input sequence** |
| --- | --- | --- | --- |
| Mer2 | *Saccharomyces cerevisiae* | CAA60944 | KVTNAGALEESDKQILEWAGKLELESMELRENSDKLIKVLNENSKTLCKSLNKFNQLLEQ |
| *Naumovozyma dairenensis* | XP_003669210.1 | SSPLKLNEADKEILKWAGKLELESCDLREKSSELIGLLKKNSTQLTSVISTLNEIVIST |
| *Tetrapisispora phaffii* | XP_003683996.1 | PVKETVFNEADQQILEWAGKLELESVDLREKAGELTTVLKRNSDRLYSVMEQLNKNLKN |
| *Vanderwaltozyma polyspora* | XP_001647040.1 | SGRDNVSEADKQILEWAGKLELETVDLKEKASELTNVFNESNTKLLELVARLNDHLGS |
| Mre11 | *Saccharomyces cerevisiae* | BAA02017 | SYGLLNGRKTKTKTRSAASTKTASRRGKGRASRTPKTDILGSLLAKKRK |
| *Naumovozyma dairenensis* | XP_003672532.1 | VARTPRKKNSKTTTKQATKAKTTRTKTRTAVTKTPKTDILGSLLARKRK |
| *Tetrapisispora phaffii* | XP_003686402.1 | ILLPSILVMKKIIQKIVPIKKEFHKWQALEKDHHHPPNLLQELQRLRRQMS |
| *Vanderwaltozyma polyspora* | XP_001642997.1 | ATPRIIETIKKKNSRKKATPSSTKRSALAGKKETKTPKTDILQSLLNKKRR |
| Smt3 | *Saccharomyces cerevisiae* | WNF20333 | MSDSEVNQEAKPEVKPEVKPETHINLKVSDGSSEIFFKIKKTTPLRRLMEAFAKRQGKEMDSLRFLYDGIRIQADQTPEDLDMEDNDIIEAHREQIGGATY |
| Mre11-SIM3 | *Saccharomyces cerevisiae* | BAA02017 (Mre11 (residues 620-692) | NDAQDDVDIDENDIIMVSTDEEDASYGLLNGRKTKTKTRSAASTKTASRRGKGRASRTPKTDILGSLLAKKRK |

**Table S5.** Protein sequences used for AlphaFold modeling.
